# Supplementary material for: The SAR analysis of dietary polyphenols and their antagonistic effects on bortezomib at physiological concentrations
Source: PubMed Central journal article supplement (PMC11306019; doi:10.3389/fphar.2024.1403424), 2024-07-25
Supplement: Table1.pdf [file Table1.pdf]

**Supplement table 1. Principle component (PC) scores of 29 polyphenols and vitamin C from the ChemGPS-NP website**

| No. | Name            | PC1      | PC2      | PC3      | PC4      | PC5      | PC6      | PC7      | PC8      |
|-----|-----------------|----------|----------|----------|----------|----------|----------|----------|----------|
| 1   | PGG             | 11.566   | 5.416364 | -3.33789 | -0.41292 | -1.57953 | -3.27749 | -0.36899 | -4.50216 |
| 2   | 1,3,6-triGG     | 5.932101 | 3.055839 | -3.52528 | -0.1976  | -1.29181 | -2.24785 | -0.06913 | -1.94221 |
| 3   | 1,2,6-triGG     | 5.932101 | 3.055839 | -3.52528 | -0.1976  | -1.29181 | -2.24785 | -0.06913 | -1.94221 |
| 4   | 1,2,3,6-tetraGG | 8.75241  | 4.256728 | -3.42914 | -0.29072 | -1.42959 | -2.76925 | -0.20519 | -3.20777 |
| 5   | Telli-pentaGG   | 11.39388 | 5.728904 | -3.61565 | -1.19136 | -1.80254 | -2.17115 | -0.31648 | -4.6615  |
| 6   | 4,3-di GG       | 5.508763 | 2.789414 | -2.49851 | 0.007788 | -1.18313 | -2.11307 | 0.156138 | -1.17208 |
| 7   | 1,4,6-triGG     | 5.932101 | 3.055839 | -3.52528 | -0.1976  | -1.29181 | -2.24785 | -0.06913 | -1.94221 |
| 8   | Cori-triGG      | 5.746611 | 3.416041 | -3.83604 | -1.12155 | -1.57203 | -0.88329 | -0.02199 | -2.13592 |
| 9   | QC              | -0.63921 | 3.099599 | -2.1874  | -0.4549  | -0.27888 | 0.038338 | -0.10574 | -0.86122 |
| 10  | EGCG            | 2.771691 | 4.022871 | -2.26123 | -0.62083 | -1.00634 | -1.22342 | -0.67976 | -1.62133 |
| 11  | tetraFV         | -1.04905 | 3.264048 | -1.59606 | -0.39271 | -0.12338 | 0.094525 | -0.09987 | -0.9856  |
| 12  | GC              | -0.52584 | 2.853466 | -2.3318  | -0.9622  | -0.36608 | -0.37347 | -1.05196 | -1.10101 |
| 13  | EGC             | -0.52584 | 2.853466 | -2.3318  | -0.9622  | -0.36608 | -0.37347 | -1.05196 | -1.10101 |
| 14  | Fisetin         | -1.0536  | 3.061221 | -1.68306 | -0.42472 | -0.14354 | 0.149343 | -0.02918 | -0.44617 |
| 15  | Myricetin       | -0.22309 | 3.138994 | -2.69222 | -0.49005 | -0.40717 | -0.076   | -0.18753 | -1.27445 |
| 16  | IG              | 0.162844 | 0.119748 | -2.6121  | -0.26161 | -0.47123 | -1.2843  | -0.43552 | -0.53397 |
| 17  | 1,2,3-triGG     | 5.932101 | 3.055839 | -3.52528 | -0.1976  | -1.29181 | -2.24785 | -0.06913 | -1.94221 |
| 18  | GA              | -2.9593  | 1.925473 | -2.87773 | 0.175865 | -0.27838 | -0.29405 | -0.24903 | -0.57051 |
| 19  | ECG             | 1.918386 | 4.040018 | -1.75403 | -0.67836 | -0.41316 | -1.02407 | -0.94643 | -1.91321 |
| 20  | GE              | -2.75799 | 1.483117 | -1.83871 | 0.391609 | 0.057876 | -1.05892 | -0.29792 | -0.75535 |
| 21  | DAA             | -3.1713  | 1.580864 | -2.0245  | 0.215232 | 0.111091 | -0.72847 | -0.28042 | -0.12754 |
| 22  | LT              | -1.04905 | 3.264048 | -1.59606 | -0.39271 | -0.12338 | 0.094525 | -0.09987 | -0.9856  |
| 23  | PC              | -3.38089 | 1.900143 | -2.31665 | 0.158983 | -0.069   | -0.23588 | -0.1971  | -0.11585 |
| 24  | DPA             | -2.96245 | 1.331037 | -1.70189 | 0.280713 | 0.22183  | -1.10686 | -0.37429 | -0.17033 |
| 25  | CA              | -2.96739 | 1.626564 | -1.83297 | 0.287443 | 0.182035 | -0.57191 | 0.013111 | -0.27709 |

|    |                  |          |          |          |          |          |          |          |          |
|----|------------------|----------|----------|----------|----------|----------|----------|----------|----------|
| 26 | CC               | -0.94236 | 2.813139 | -1.82586 | -0.92925 | -0.2368  | -0.26355 | -0.97364 | -0.6863  |
| 27 | EC               | -0.94236 | 2.813139 | -1.82586 | -0.92925 | -0.2368  | -0.26355 | -0.97364 | -0.6863  |
| 28 | HT               | -3.43864 | 1.394551 | -1.73752 | -0.20423 | 0.296465 | -0.94031 | -0.86765 | 0.006667 |
| 29 | Rutin<br>hydrate | 4.755525 | 0.797689 | -4.10561 | -1.25962 | -1.57885 | -1.16111 | -0.36028 | 0.214853 |
| 30 | Vitamin C        | -3.16688 | -1.03724 | -3.48814 | 0.268925 | -0.59301 | -0.33508 | 0.439129 | 0.145236 |

---
